# Supplementary material for: α-Aminobutyric Acid Constrains Macrophage-Associated Inflammatory Diseases through Metabolic Reprogramming and Epigenetic Modification
Source: MDPI journal article supplement (doi:10.3390/ijms241310444), 2023-06-21
Supplement: s1 [file s1]

## Supplementary Information for

### **$\alpha$ -Aminobutyric Acid Constrains Macrophage-Associated Inflammatory Diseases through Metabolic Reprogramming and Epigenetic Modification**

Fei Li <sup>1</sup>, Yuting Xia <sup>2</sup>, Shijie Yuan <sup>1</sup>, Xiaorong, Xie <sup>1</sup>, Lin Li <sup>3</sup>, Yuan Luo <sup>1</sup>, Qiuyang Du <sup>1</sup>, Yuqi Yuan <sup>1</sup> and Ran He <sup>1,\*</sup>

<sup>1</sup> Department of Immunology, School of Basic Medicine, Tongji Medical College, Huazhong University of Science and Technology, Wuhan 430032, China; feili@hust.edu.cn (Fei Li)

<sup>2</sup> Department of Dermatology, Tongji Medical College, Huazhong University of Science and Technology, Wuhan 430032, China

<sup>3</sup> State Key Laboratory of Oncology in South China, Sun Yat-sen University Cancer Center, Guangzhou 510060, China

\* Correspondence: ranhe@hust.edu.cn (Ran He).

#### **This PDF file includes:**

1. Reagents
2. Supplementary methods

#### **1. Reagents**

| Reagents                           | Identify | Source | City and Country  |
|------------------------------------|----------|--------|-------------------|
| $\alpha$ -aminobutyric acid (AABA) | A1879    | Sigma  | Garlsbad, CA, USA |
| anti- $\beta$ -actin rabbit        | D4E3M    | CST    | Danvers, MA, USA  |
| anti-iNOS rabbit                   | D6B6S    | CST    | Danvers, MA, USA  |
| anti-p38 rabbit                    | D13E1    | CST    | Danvers, MA, USA  |
| anti-Phospho-p38 rabbit            | D3F9     | CST    | Danvers, MA, USA  |
| anti-JNK rabbit                    | 9252     | CST    | Danvers, MA, USA  |

|                                       |            |            |                    |
|---------------------------------------|------------|------------|--------------------|
| anti-Phospho-JNK rabbit               | 81E11      | CST        | Danvers, MA, USA   |
| anti-p44/42 rabbit                    | 137F5      | CST        | Danvers, MA, USA   |
| anti-Phospho-p44/42 rabbit            | D13.14.4E  | CST        | Danvers, MA, USA   |
| anti-p65 rabbit                       | D14E12     | CST        | Danvers, MA, USA   |
| anti-Phospho-p65 rabbit               | 93H1       | CST        | Danvers, MA, USA   |
| anti-H3K27me3 rabbit                  | C36B11     | CST        | Danvers, MA, USA   |
| anti-H3K4me3 rabbit                   | C42D8      | CST        | Danvers, MA, USA   |
| anti-H3K9me3 rabbit                   | D4W1U      | CST        | Danvers, MA, USA   |
| anti-H3K27ac rabbit                   | D5E4       | CST        | Danvers, MA, USA   |
| mouse anti-CD80                       | 16-10A1    | BioLegend  | San Diego, CA, USA |
| mouse anti-CD86                       | GL-1       | BioLegend  | San Diego, CA, USA |
| mouse anti-F4-80                      | BM8        | BioLegend  | San Diego, CA, USA |
| Fixable Viability Dye                 | 65-0866-14 | Thermo     | Garlsbad, CA, USA  |
| anti-CD16/32                          | 93         | BioLegend  | San Diego, CA, USA |
| mouse anti-CD45                       | S18009D    | BioLegend  | San Diego, CA, USA |
| mouse anti-CD11b                      | M1/70      | BioLegend  | San Diego, CA, USA |
| TMRE                                  | T669       | Thermo     | Garlsbad, CA, USA  |
| mito tracker Deep Red                 | M22426     | Invitrogen | Carlsbad, CA, USA  |
| RIPA Lysis Buffer                     | P0013K     | Beyotime   | Wuhan, China       |
| Phenylmethanesulfonyl fluoride (PMSF) | G2002      | Servicebio | Wuhan, China       |
| phosphatase inhibitor cocktails       | K1015      | APExBIO    | Boston, MA, USA    |
| Protein Free Rapid Blocking Buffer    | PS108      | Epizyme    | Shanghai, China    |

|                                              |            |            |                      |
|----------------------------------------------|------------|------------|----------------------|
| HRP-linked anti-rabbit                       | GB23303    | Servicebio | Wuhan, China         |
| 6× protein loading buffer                    | DL101-02   | TransGen   | Beijing, China       |
| PageRuler Prestained Protein Ladder          | 26616      | Thermo     | Garlsbad, CA, USA    |
| BeyoECL Moon                                 | P0018FS    | Beyotime   | Wuhan, China         |
| Goldenstar™ RT6 cDNA Synthesis Mix           | TSK314S    | TSINGKE    | Beijing, China       |
| DSS                                          | 60316ES60  | YEASEN     | Shanghai, China      |
| Dithiothreitol (DTT)                         | BS110      | biosharp   | Anhui, China         |
| Ethylene Diamine Tetraacetic Acid (EDTA)     | BS107      | biosharp   | Anhui, China         |
| Type IV collagenase                          | BS165      | biosharp   | Anhui, China         |
| DNase I                                      | BS137      | biosharp   | Anhui, China         |
| Percoll                                      | 17089101   | Cytiva     | Marlborough, MA, USA |
| LPS                                          | L2880      | Sigma      | Garlsbad, CA, USA    |
| Accutase                                     | 00-4555-56 | Thermo     | Garlsbad, CA, USA    |
| DMEM                                         | 8121451    | Gibco      | Garlsbad, CA, USA    |
| M-CSF (macrophage colony stimulating factor) | 315-02     | Peprotech  | Cranbury, NJ, USA    |
| FBS                                          | SA101.02   | Cellmax    | Beijing, China       |
| LPS ( <i>in vitro</i> )                      | tlrl-ebmps | InvivoGen  | San Diego, CA, USA   |
| EPZ6438                                      | S7128      | Selleck    | Houston, TX, USA     |
| TRIzol reagent                               | R0016      | Beyotime   | Wuhan, China         |
| IL-6 ELISA kit                               | 1210602    | DAKEWE     | Beijing, China       |
| TNF- $\alpha$ ELISA kit                      | 1217202    | DAKEWE     | Beijing, China       |
| ALT                                          | C010-2-1   | NJCBIO     | Nanjing, China       |

|                               |            |          |                      |
|-------------------------------|------------|----------|----------------------|
| AST                           | C009-2-1   | NJCBIO   | Nanjing, China       |
| NO                            | S0021S     | Beyotime | Wuhan, China         |
| CCK8 kit                      | C0037      | Beyotime | Wuhan, China         |
| XF Glycolysis Stress Test Kit | 103020-100 | Agilent  | Santa Clara, CA, USA |
| XF Cell Mito Stress Test Kit  | 103015-100 | Agilent  | Santa Clara, CA, USA |

## 2. Supplementary methods

### *RNA purification, RT-PCR and real-time PCR*

TRIzol reagent was used to extract cellular and tissue RNA. Next, Goldenstar™ RT6 cDNA Synthesis Mix was mixed with 1 µg of RNA for 15 min at 50 °C and 5 min at 85 °C. At the end of the reaction, the cDNA, TSINGKE Master qPCR Mix and 10 pmol of forward and reverse primers were mixed and subsequently analyzed for target gene mRNA levels. After cDNA amplification with Biorad CFX connect thermocycler (Biorad, CA, USA), the relative quantification of mRNA was normalized to  $\beta$ -actin (*Actb*). The primers are listed as follows: *Actb* (forward: 5'-TCCATCATGAAGTGTG-ACGT-3'), reverse: 5'-TACTCCTGC-TTGCTGATCCAC-3'); *Nos2* (forward: 5'-GAGACAGGGAAGTCTGAAG-CAC-3', reverse: 5'-CCAGCAGTA-GTTGCT-CCTCTTC-3'); *Tnfa* (forward: 5'-CAGGCGGTGCCT-ATGTCTC-3', reverse: 5'-CGATCACCCGAAGTTC-AGTAG-3'); *Il6* (forward: 5'-CTGCAAGAGACTT-CCATCCAG-3'), reverse: 5'-AGTGGTATAGACAGGT-CTGTTGG-3').

### *Chromatin immunoprecipitation (ChIP)*

At 24 h of cell treatment, 270 µl of 37% paraformaldehyde was added to 10 ml cell culture medium, mixed well, and incubated for 10 min at 37 °C for fixation and cross-linking. Next, the reaction was terminated by adding glycine and incubating at room temperature for 5 min. Afterwards,  $1 \times 10^7$  cells were collected in SDS lysis buffer and was fragmented by sonication. Chromatin was then pulldown with 1 µg of anti-H3K27me3 or IgG control antibody at 4 °C overnight. Next, the proteins and chromatin were uncross-linked at 65 °C for 4 hours. The DNA was then eluted and purified, and finally analyzed using a chromatin immunoprecipitation (ChIP)-qPCR procedure with Biorad CFX connect thermocycler (Biorad, CA, USA). DNA were first normalized to control IgG, followed by normalized to Input DNA. ChIP-qPCR primers are used as follows: *Nos2* (forward: 5'-AGTGTTCTGGCTTATCCT-3', reverse: 5'-ATGTCCTACCTGGGTGTG-3'); *Tnfa* (forward: 5'-GTTG-TAGAG-TGTTCAATGAGAG-3', reverse: 5'-GCGTCTTGTCTGATCTGTT-3'); *Il6* (forward: 5'-CACAGGCGATTAGAGTAGAT-3', reverse: 5'-GATTGT-GATCCTGAGAGTGT-3').

### *Immunoblotting*

Cells were lysed using RIPA lysis solution containing 1× PMSF and phosphatase inhibitor cocktails, mixed with 6× protein loading buffer, heated at 100 °C for protein

denaturation, followed by a short centrifugation. Next, proteins were separated by 10% gels SDS-PAGE, then blotted onto 0.45  $\mu$ m PVDF membranes. Next, the Protein Free Rapid Blocking Buffer was used to block the membrane for 30 min at room temperature. The membrane was incubated with the antibodies in Table S5 at 4 °C overnight. Membranes were then washed 3 times for 5 min, and incubated with HRP-linked anti-rabbit secondary antibodies, followed by analysis of exposure with ChemiDoc XRS (Biorad, CA, USA)

#### *Flow cytometry*

1 ml of FBS was dissolved in 100 ml of PBS for FACS buffer. Cells were seeded in 96-well plates at a density of  $1 \times 10^6$  cells, followed by incubation with anti-CD16/32 antibody on ice for 10 min. Then, the cells were washed with ice-cold FACS buffer, followed by incubation with cell surface antibodies (Fixable Viability Dye, f4-80, CD11b, CD80, CD86) for 30 min at 4 °C. The cells were then washed with ice-cold FACS buffer three times. Finally, the cells were resuspended with FACS buffer and detected by BD FACS CANTO or BD FACS LSR II (BD Biosciences, CA, USA). and data were analyzed using FlowJo V10 software (BD Biosciences, CA, USA).

#### *Mitochondrial membrane potential assay*

Cells were collected and then washed twice with ice-cold PBS. Cells were incubated with 50 nM TMRE, 50 nM Mito Deep Red for 30 min at 37 °C. At last, cells were washed by ice-cold PBS twice, then cells were resuspended with PBS and detected by flowmetry within 1 h.

#### *Bactericidal ability test*

The untreated BMDMs, LPS-treated BMDMs and LPS + 100 or 1000  $\mu$ M AABA-treated BMDMs for 24 h were co-cultured with E. coli at a ratio of 1:10 for 6 h and then collected and coated in ampicillin-containing agarose solid medium for 24 h, then colony- forming units were counted.
